# Supplementary material for: Oxidative addition or Werner coordination complex? Reactivity of β-diketiminate supported main group and first-row transition metal complexes towards ammonia
Source: Royal Society of Chemistry journal article supplement (doi:10.1039/d2dt02427f), 2022-01-01
Supplement: d2dt02427f1.pdf [file d2dt02427f1.pdf]

Supporting information

for

**Oxidative Addition or Werner Coordination Complex? Reactivity of  $\beta$ -  
diketiminato Supported Main Group and First-row Transition Metal  
Complexes towards Ammonia**

by

Petra Vasko\*<sup>a</sup> and Cheuk W. Lau<sup>a</sup>

<sup>a</sup>*Department of Chemistry, University of Helsinki, A. I. Virtasen aukio 1, P.O. Box 55, 00014 Helsinki, Finland. E-mail: [petra.vasko@helsinki.fi](mailto:petra.vasko@helsinki.fi)*

**Table S1.** Comparison of selected bond parameters of reported nacnacM compounds.

|                            |                     | QAMXOR<br>(M = Al) | XEDHOD<br>(M = Ga) | BICXAN<br>(M = In) | CEPHAH<br>(M = Si) | GEMDAE<br>(M = Ge) | XUGQOG<br>(M = Si) | HOVGOP<br>(M = Ge) |
|----------------------------|---------------------|--------------------|--------------------|--------------------|--------------------|--------------------|--------------------|--------------------|
| <b>M-N BOND LENGTH (Å)</b> | <b>Experimental</b> | 1.9931             | 2.0793             | 2.3077             | 1.735              | 1.865              | 1.727              | 2.0297             |
|                            |                     | 1.9882             | 2.0793             | 2.3072             | 1.734              | 1.866              | 1.724              | 2.0296             |
|                            | <b>Calculated</b>   |                    |                    |                    |                    |                    | 1.653              | 1.8448             |
|                            |                     | 1.9576             | 2.0528             | 2.2756             | 1.736              | 1.852              | 1.737              | 2.0297             |
|                            |                     | 1.9570             | 2.0560             | 2.2682             | 1.750              | 1.869              | 1.728              | 2.0296             |
|                            |                     |                    |                    |                    |                    |                    | 1.699              | 1.8449             |
| <b>N-M-N ANGLE (°)</b>     | <b>Experimental</b> | 88.5               | 86.6               | 80.7               | 99.3               | 95.8               | 103.1              | 88.6               |
|                            | <b>Calculated</b>   | 89.9               | 87.5               | 81.1               | 98.6               | 95.8               | 103.1              | 88.6               |
| <b>M-N-C-C ANGLE (°)</b>   | <b>Experimental</b> | -5.3               | 0.0                | -2.3               | -0.8               | 2.4                | 7.8                | -95.4              |
|                            |                     | 3.8                | -0.0               | 2.3                | -1.2               | 0.1                | -11.0              |                    |
|                            | <b>Calculated</b>   | 1.9                | 2.1                | 2.3                | 0.0                | 0.0                | -3.9               | -95.4              |
|                            |                     | 1.53695            | 1.7                | 0.9                | 0.0                | 0.0                | -5.5               |                    |
| <b>REFERENCE</b>           |                     | 1                  | 2                  | 3                  | 4                  | 5                  | 6                  | 7                  |

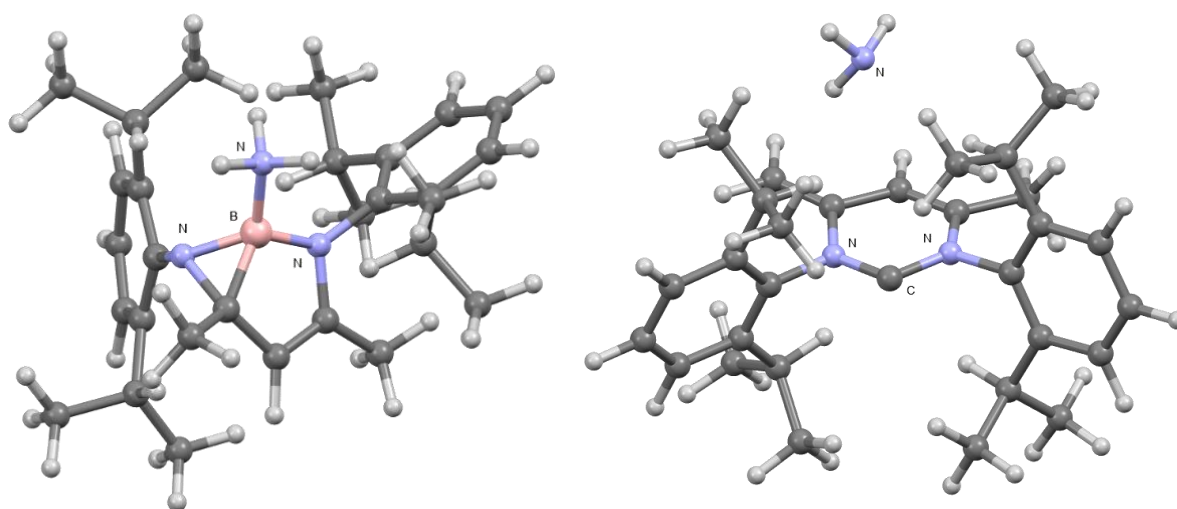

**Figure S1.** Optimised structure of NaCNacB·NH<sub>3</sub> (left) and NaCNacC·NH<sub>3</sub> (right).

**Table S2.** Comparison of group 14 NacnacM relative stabilities of 1,1- and 1,4-oxidative addition reaction products. The differences to free starting materials NacnacM and NH<sub>3</sub> are given in Gibbs free energies (kJ/mol).

| Compound | 1,1-oxidative addition (kJ/mol) | 1,4-oxidative addition (kJ/mol) |
|----------|---------------------------------|---------------------------------|
| NacnacC  | -67.3                           | 42.5                            |
| NacnacSi | -126.6                          | -48.1                           |
| NacnacGe | 10.1                            | -46.8                           |
| NacnacSn | 95.5                            | -70.1                           |
| NacnacPb | 242.2                           | -66.2                           |

**Table S3.** EDA-NOCV derived most important deformation densities for the interaction between NacnacM and NH<sub>3</sub> fragments in NacnacM·NH<sub>3</sub> complexes.

| Compound | Orbital interaction (kJ/mol) | Percentage of all orbital interactions (%) |
|----------|------------------------------|--------------------------------------------|
| NacnacFe | -50.1                        | 38                                         |
| NacnacCo | -55.8                        | 46                                         |
| NacnacNi | -94.0                        | 62                                         |
| NacnacCu | -64.1                        | 58                                         |
| NacnacAl | -98.1                        | 72                                         |
| NacnacGa | -47.6                        | 71                                         |
| NacnacIn | -41.1                        | 68                                         |
| NacnacSi | -180.9                       | 77                                         |
| NacnacGe | -134.8                       | 77                                         |
| NacnacSn | -99.2                        | 74                                         |
| NacnacPb | -78.1                        | 72                                         |

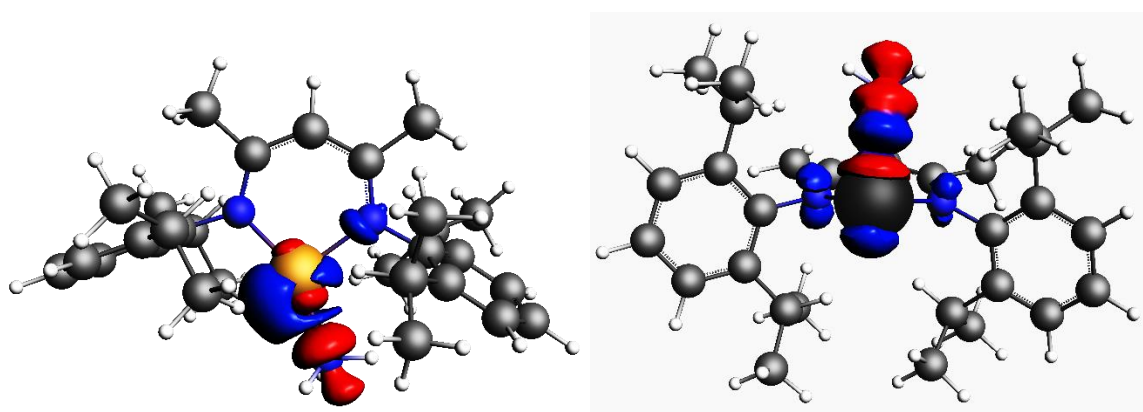

**Figure S2.** The most important EDA-NOCV deformation density of NacnacCu·NH<sub>3</sub> (left) and NacnacPb·NH<sub>3</sub> (right). Isovalue set at  $\pm 0.002$  a.u. and red contour corresponds to the depletion of electron density and blue contour the accumulation of electron density.

## References

1. C. Cui, H. W. Roesky, H.-G. Schmidt, M. Noltemeyer, H. Hao and F. Cimpoesu, *Angew. Chem. Int. Ed.*, 2000, **39**, 4274–4276.
2. N. J. Hardman, B. E. Eichler and P. P. Power, *Chem. Commun.*, 2000, 1991–1992.
3. M. S. Hill and P. B. Hitchcock, *Chem. Commun.*, 2004, 1818–1819.
4. M. Driess, S. Yao, M. Brym, C. van Wüllen and D. Lentz, *J. Am. Chem. Soc.*, 2006, **128**, 9628–9629.
5. M. Driess, S. Yao, M. Brym and C. van Wüllen, *Angew. Chem. Int. Ed.*, 2006, **45**, 4349–4352.
6. A. Jana, C. Schulzke and H. W. Roesky, *J. Am. Chem. Soc.*, 2009, **131**, 4600–4601.
7. A. Jana, I. Objartel, H. W. Roesky and D. Stalke, *Inorg. Chem.*, 2009, **48**, 798–800.
