# Supplementary material for: Oxidative addition or Werner coordination complex? Reactivity of β-diketiminate supported main group and first-row transition metal complexes towards ammonia
Source: Royal Society of Chemistry journal article supplement (doi:10.1039/d2dt02427f), 2022-01-01
Supplement: d2dt02427f2.xlsx [file d2dt02427f2.xlsx]

## Sheet: NH3
4
-56.5137
N	-2e-05	2e-05	-0.11273
H	0.6674	0.66223	0.26304
H	-0.90721	0.24671	0.2631
H	0.23997	-0.90909	0.263

## Sheet: Al-opt
73
-1480.7
Al	-0.00814	-0.26353	-0.99995
N	1.37459	-0.23622	0.42843
C	1.22166	-0.32415	1.74534
C	-0.02623	-0.38062	2.36212
C	-1.26761	-0.25746	1.73679
N	-1.40093	-0.14712	0.42101
C	2.69832	-0.07182	-0.08951
C	3.4321	-1.19375	-0.49733
C	4.68495	-0.99211	-1.06623
C	5.20142	0.28004	-1.22886
C	4.46478	1.37746	-0.82014
C	3.20778	1.22578	-0.24723
C	2.89176	-2.59867	-0.35259
C	2.54865	-3.18986	-1.71761
C	2.41062	2.44681	0.15717
C	3.21593	3.40899	1.02367
C	2.43172	-0.34266	2.62969
C	-2.48166	-0.25681	2.61855
C	-2.70826	0.06493	-0.11606
C	-3.57484	-1.01838	-0.31189
C	-4.83294	-0.76685	-0.84767
C	-5.21891	0.51485	-1.19369
C	-4.3356	1.56791	-1.03307
C	-3.06583	1.3662	-0.50491
C	-3.14547	-2.439	-0.02051
C	-4.2149	-3.25019	0.70157
C	-2.09742	2.51941	-0.35067
C	-2.15988	3.13102	1.04656
C	3.85133	-3.50754	0.40941
C	1.85659	3.15686	-1.07579
C	-2.72019	-3.12983	-1.31519
C	-2.26803	3.59263	-1.41547
H	-6.20475	0.69226	-1.60805
H	-1.08891	2.10776	-0.47791
H	-4.63607	2.56348	-1.33542
H	-2.26679	-2.39831	0.62726
H	-5.5193	-1.59084	-1.00466
H	-4.56381	-2.74696	1.60664
H	-3.81733	-4.22717	0.98652
H	-5.0853	-3.42825	0.0656
H	-3.56153	-3.1939	-2.01063
H	-2.36561	-4.14428	-1.11355
H	-1.9186	-2.57622	-1.81168
H	-3.16313	3.51332	1.25526
H	-1.45624	3.96368	1.1297
H	-1.90646	2.40373	1.81888
H	-2.25969	3.1609	-2.41813
H	-1.44912	4.31252	-1.34867
H	-3.19932	4.15098	-1.28932
H	1.55804	2.10793	0.75023
H	1.96501	-2.53973	0.22321
H	5.26412	-1.8491	-1.39155
H	1.82309	-2.56418	-2.24307
H	2.12417	-4.19135	-1.60727
H	3.4421	-3.26805	-2.34319
H	4.87196	2.3733	-0.95427
H	4.78327	-3.65759	-0.14121
H	3.39948	-4.49039	0.56436
H	4.10817	-3.09432	1.38768
H	6.1786	0.41739	-1.67747
H	3.62964	2.90871	1.90242
H	2.58063	4.22889	1.36773
H	4.04843	3.85057	0.4706
H	2.66864	3.52178	-1.71054
H	1.24202	4.01323	-0.78459
H	1.24389	2.48041	-1.67848
H	-0.03225	-0.47035	3.43876
H	-3.17453	0.53808	2.3401
H	-2.19997	-0.14356	3.66398
H	-3.026	-1.19806	2.50763
H	2.1513	-0.48784	3.6713
H	3.11977	-1.13443	2.32723
H	2.98336	0.59614	2.53926

## Sheet: Al-OA
77
-1537.29
C	5.1945	0.65575	-1.15311
C	4.84334	-0.66083	-0.92238
C	3.60382	-0.99752	-0.38788
C	2.70857	0.03764	-0.0825
C	3.04377	1.37952	-0.32682
C	4.29609	1.66451	-0.85747
N	1.40947	-0.24839	0.44435
C	1.24378	-0.35138	1.75621
C	2.44187	-0.34889	2.65594
C	3.27385	-2.45671	-0.1673
C	4.27659	-3.13464	0.76395
C	2.09746	2.51497	-0.00463
C	1.85452	3.41131	-1.2131
C	2.59616	3.32913	1.18692
C	3.20326	-3.20491	-1.49565
C	-0.00925	-0.45199	2.36263
C	-1.25956	-0.31564	1.75164
N	-1.41805	-0.19168	0.44216
C	-2.71298	0.08712	-0.09869
C	-3.63286	-0.94417	-0.33227
C	-4.86989	-0.61241	-0.87707
C	-5.19027	0.69379	-1.19016
C	-4.26291	1.69805	-0.97389
C	-3.01356	1.41899	-0.43448
C	-3.33415	-2.39617	-0.03316
C	-3.27235	-3.21193	-1.32188
C	-2.01802	2.53134	-0.18838
C	-2.08261	3.63194	-1.23747
C	-2.17072	3.11476	1.21442
C	-4.35633	-3.00476	0.92455
C	-2.4534	-0.31223	2.6588
Al	-0.00351	-0.41023	-0.83972
N	-0.03918	-2.01655	-1.63516
H	-6.15996	0.93083	-1.61287
H	-1.02182	2.08908	-0.25654
H	-4.51443	2.71849	-1.23498
H	-2.34881	-2.4462	0.43579
H	-5.59319	-1.39861	-1.06253
H	-4.46767	-2.41738	1.83791
H	-4.05838	-4.01862	1.20346
H	-5.34217	-3.07016	0.45734
H	-4.23678	-3.19997	-1.83669
H	-3.02466	-4.25427	-1.1018
H	-2.51144	-2.81017	-1.99091
H	-3.16901	3.54031	1.35065
H	-1.43829	3.91002	1.37784
H	-2.0181	2.35913	1.98639
H	-1.9923	3.22187	-2.24505
H	-1.26312	4.33729	-1.08446
H	-3.01274	4.20312	-1.17917
H	1.1379	2.07725	0.27612
H	2.28502	-2.50786	0.29417
H	5.54643	-1.45023	-1.1637
H	2.45408	-2.75601	-2.14758
H	2.9331	-4.25164	-1.32974
H	4.17042	-3.18717	-2.00521
H	4.57106	2.69671	-1.04319
H	5.26794	-3.18336	0.30633
H	3.96287	-4.15944	0.97795
H	4.38257	-2.60618	1.71349
H	6.16675	0.89581	-1.56809
H	2.71849	2.708	2.07665
H	1.88754	4.12583	1.42814
H	3.56185	3.79305	0.96844
H	2.77469	3.89896	-1.54453
H	1.13948	4.19815	-0.96064
H	1.44914	2.83578	-2.04652
H	-0.01371	-0.55366	3.43828
H	2.98185	-1.29335	2.55853
H	2.14582	-0.22518	3.6956
H	3.14155	0.44076	2.38057
H	-3.2462	0.33433	2.28494
H	-2.17058	-0.00125	3.66314
H	-2.86347	-1.32329	2.72236
H	-0.03199	-2.92241	-1.19651
H	-0.05422	-2.12303	-2.63636
H	0.02207	0.78633	-1.89058

## Sheet: Al-adduct
77
-1537.23
C	5.22201	0.84151	-1.03417
C	4.90979	-0.49958	-0.90757
C	3.66723	-0.90864	-0.4395
C	2.71667	0.06604	-0.09702
C	3.02081	1.42839	-0.22753
C	4.27937	1.79215	-0.69397
N	1.41629	-0.3145	0.35341
C	1.23562	-0.52488	1.6449
C	2.41383	-0.5169	2.57658
C	3.36041	-2.38527	-0.34697
C	4.47247	-3.18943	0.31699
C	2.02595	2.51009	0.1218
C	1.70688	3.36822	-1.09733
C	2.51528	3.37026	1.28358
C	3.0418	-2.94196	-1.73374
C	-0.02575	-0.722	2.22424
C	-1.27289	-0.4497	1.64086
N	-1.43507	-0.22514	0.34938
C	-2.72576	0.16561	-0.11936
C	-3.73905	-0.78677	-0.30591
C	-4.98762	-0.3615	-0.74604
C	-5.23543	0.97063	-1.01103
C	-4.21698	1.89525	-0.86509
C	-2.95217	1.51706	-0.43085
C	-3.49164	-2.26644	-0.12112
C	-3.27196	-2.9197	-1.4859
C	-1.84305	2.53707	-0.30659
C	-2.04148	3.7424	-1.21371
C	-1.64087	2.99068	1.13715
C	-4.60162	-2.98055	0.64175
C	-2.44793	-0.37992	2.5755
Al	-0.01641	-0.54884	-1.07544
N	-0.07261	-2.66414	-0.39448
H	-6.21501	1.28759	-1.34995
H	-0.92554	2.03245	-0.63493
H	-4.40882	2.93316	-1.10463
H	-2.57557	-2.37546	0.46349
H	-5.77695	-1.08992	-0.89203
H	-4.80839	-2.5001	1.60066
H	-4.32073	-4.01899	0.83492
H	-5.53426	-2.9983	0.0736
H	-4.18712	-2.86981	-2.08114
H	-3.00438	-3.97702	-1.38214
H	-2.4928	-2.40276	-2.0546
H	-2.55614	3.44288	1.53012
H	-0.84631	3.73956	1.19257
H	-1.36068	2.16369	1.79039
H	-2.21674	3.43882	-2.24763
H	-1.15153	4.37306	-1.19399
H	-2.88108	4.36331	-0.88933
H	1.1021	2.0218	0.43698
H	2.47199	-2.48883	0.28043
H	5.64777	-1.24573	-1.17916
H	2.24688	-2.36819	-2.22085
H	2.74573	-3.99554	-1.68024
H	3.92272	-2.88137	-2.37789
H	4.52185	2.84436	-0.79454
H	5.38035	-3.20154	-0.29012
H	4.15961	-4.22788	0.45292
H	4.73382	-2.78177	1.29622
H	6.19684	1.14327	-1.39953
H	2.72034	2.76806	2.17151
H	1.76219	4.11636	1.55016
H	3.43406	3.90267	1.02365
H	2.60473	3.85675	-1.48435
H	0.99289	4.15204	-0.83496
H	1.27834	2.7611	-1.89776
H	-0.03289	-0.90382	3.28939
H	3.16046	-1.25171	2.26879
H	2.10581	-0.72652	3.59929
H	2.91121	0.45491	2.54892
H	-3.00914	0.54285	2.41798
H	-2.12262	-0.42886	3.61306
H	-3.14303	-1.20085	2.38828
H	-0.90971	-3.11774	-0.74013
H	0.7244	-3.16252	-0.77175
H	-0.05511	-2.73483	0.62119

## Sheet: B-opt
73
-1263.13
C	-3.0439	1.12652	-0.758
C	-2.489	0.03018	-0.09651
C	-3.15003	-1.20247	-0.01585
C	-4.39496	-1.31637	-0.62097
C	-4.96369	-0.24164	-1.28469
C	-4.29179	0.96383	-1.35314
N	-1.20467	0.1375	0.52925
B	-3e-05	-8e-05	-0.26492
C	-2.47846	-2.38819	0.63961
C	-3.45047	-3.40796	1.21348
C	-2.31842	2.44602	-0.86822
C	-3.19899	3.63255	-0.49336
C	-1.14895	0.38583	1.87049
C	-2.29339	1.03977	2.56457
C	2e-05	0.0002	2.5408
C	1.14896	-0.38555	1.87049
C	2.29354	-1.03916	2.56468
N	1.20466	-0.13748	0.52922
C	2.48899	-0.03028	-0.09651
C	3.04386	-1.12667	-0.75789
C	4.29184	-0.96412	-1.35295
C	4.96378	0.24129	-1.28457
C	4.39503	1.31615	-0.62102
C	3.15009	1.20239	-0.01595
C	2.31827	-2.44611	-0.86817
C	1.73292	-2.60795	-2.26822
C	2.47852	2.38821	0.6393
C	3.45055	3.40793	1.21325
C	3.19871	-3.63281	-0.49358
C	1.52399	3.04228	-0.35776
C	-1.52368	-3.04225	-0.35721
C	-1.73328	2.60815	-2.26832
H	-5.93603	-0.34787	-1.75234
H	-1.47916	2.42046	-0.17008
H	-4.74247	1.79753	-1.87919
H	-1.87669	-2.00924	1.47066
H	-4.92784	-2.25813	-0.57729
H	-4.16856	-2.9441	1.89388
H	-2.90109	-4.17187	1.76857
H	-4.01104	-3.92287	0.42912
H	-2.08197	-3.46567	-1.19672
H	-0.95517	-3.84687	0.1176
H	-0.82139	-2.30977	-0.76953
H	-4.01933	3.76922	-1.20213
H	-2.60948	4.55276	-0.49711
H	-3.63721	3.51173	0.50067
H	-1.05081	1.78329	-2.4859
H	-1.18283	3.54951	-2.34858
H	-2.5261	2.61225	-3.02167
H	1.87655	2.00943	1.47026
H	1.47909	-2.42055	-0.16992
H	4.74248	-1.79793	-1.87887
H	1.05036	-1.78307	-2.48549
H	1.18254	-3.54934	-2.34864
H	2.52561	-2.61179	-3.0217
H	4.92797	2.25788	-0.57743
H	4.01884	-3.76968	-1.20256
H	2.609	-4.55289	-0.49719
H	3.6372	-3.51211	0.50035
H	5.93617	0.34747	-1.75214
H	4.1684	2.94406	1.8939
H	2.90114	4.17201	1.7681
H	4.01138	3.92264	0.42896
H	2.08245	3.46552	-1.19723
H	0.95552	3.84705	0.11687
H	0.82163	2.30984	-0.77003
H	7e-05	0.0003	3.62284
H	2.46935	-2.03818	2.15307
H	2.08584	-1.14026	3.62929
H	3.22221	-0.47886	2.43415
H	-2.46761	2.03964	2.15429
H	-2.08646	1.13913	3.62949
H	-3.2226	0.48079	2.43242

## Sheet: B-OA
77
-1319.76
C	4.8924	0.52121	-1.50562
C	4.52623	-0.7646	-1.16134
C	3.3389	-1.02223	-0.48149
C	2.51411	0.06149	-0.151
C	2.87261	1.37508	-0.49302
C	4.06837	1.58078	-1.16934
N	1.26774	-0.14347	0.51865
C	1.22255	-0.30885	1.82716
C	2.47124	-0.35837	2.65108
C	3.01494	-2.45316	-0.11329
C	4.07399	-3.04695	0.8146
C	2.01326	2.55087	-0.0874
C	1.99176	3.65909	-1.13077
C	2.45172	3.10158	1.26816
C	2.87042	-3.33307	-1.35231
C	0.00335	-0.43718	2.49006
C	-1.21405	-0.32703	1.82647
N	-1.26607	-0.18976	0.5134
C	-2.5265	0.02577	-0.12869
C	-3.34811	-1.05396	-0.48017
C	-4.55979	-0.7812	-1.1073
C	-4.9549	0.5142	-1.38181
C	-4.13213	1.56739	-1.02886
C	-2.91141	1.34558	-0.40262
C	-2.98025	-2.49599	-0.21257
C	-2.78517	-3.25876	-1.52011
C	-2.0554	2.52929	-0.01455
C	-1.70973	3.38605	-1.22688
C	-2.72529	3.36817	1.07091
C	-4.02322	-3.20365	0.65075
C	-2.47373	-0.34461	2.63047
B	-0.00809	-0.23612	-0.44048
N	-0.03967	-1.4542	-1.28808
H	-5.90384	0.70282	-1.87096
H	-1.12175	2.14185	0.39502
H	-4.44348	2.58441	-1.24019
H	-2.02785	-2.50148	0.32134
H	-5.20546	-1.60562	-1.38843
H	-4.22295	-2.67344	1.58409
H	-3.6862	-4.21316	0.89972
H	-4.97465	-3.29696	0.12106
H	-3.72009	-3.30815	-2.08504
H	-2.46494	-4.28524	-1.31882
H	-2.0286	-2.76672	-2.13034
H	-3.67028	3.78955	0.71793
H	-2.0779	4.19834	1.36566
H	-2.93857	2.77509	1.96287
H	-1.184	2.79714	-1.98016
H	-1.06876	4.22074	-0.93392
H	-2.60742	3.80595	-1.68773
H	0.99291	2.17961	0.01627
H	2.05917	-2.45339	0.41505
H	5.1754	-1.59249	-1.42385
H	2.13276	-2.9282	-2.04482
H	2.56261	-4.34356	-1.07033
H	3.82077	-3.41479	-1.88587
H	4.36244	2.58806	-1.43739
H	5.03374	-3.14181	0.30042
H	3.77587	-4.04576	1.14368
H	4.237	-2.42925	1.69857
H	5.82098	0.70039	-2.03559
H	2.39546	2.342	2.04927
H	1.81193	3.9366	1.56612
H	3.483	3.46332	1.22467
H	2.9653	4.14503	-1.23359
H	1.27854	4.43221	-0.83781
H	1.69514	3.27691	-2.10937
H	0.00513	-0.55255	3.56347
H	2.7087	-1.39852	2.8876
H	2.31057	0.16055	3.59644
H	3.32713	0.07629	2.13915
H	-3.14164	0.46569	2.33657
H	-2.24675	-0.26142	3.69178
H	-3.01731	-1.27608	2.46312
H	0.17728	-2.34833	-0.87538
H	0.38347	-1.37901	-2.19794
H	-0.01343	0.7446	-1.16076

## Sheet: B-adduct
77
-1319.7
C	3.58115	-1.82756	-1.12395
C	2.91508	-2.25238	0.01359
C	2.23427	-1.35602	0.82134
C	2.15636	0.01168	0.45302
C	2.98082	0.46831	-0.59452
C	3.64474	-0.47072	-1.37949
N	1.29529	0.79399	1.21808
C	0.60746	2.08797	0.93121
C	0.95159	3.19982	1.87892
C	1.6775	-1.82403	2.15105
C	2.74423	-2.5319	2.98251
C	3.2929	1.93158	-0.81845
C	3.11504	2.37083	-2.26661
C	4.7107	2.23289	-0.33159
C	0.44631	-2.71209	2.02053
C	0.26031	2.41095	-0.46624
C	-0.52927	1.48145	-1.04148
N	-0.85953	0.43069	-0.17734
C	-2.07754	-0.27891	-0.32983
C	-3.28214	0.33513	0.06441
C	-4.47703	-0.36338	-0.07164
C	-4.49321	-1.64527	-0.58939
C	-3.3074	-2.24295	-0.97691
C	-2.08734	-1.5835	-0.8592
C	-3.3046	1.75649	0.58874
C	-4.0907	1.891	1.89147
C	-0.82125	-2.26133	-1.33207
C	-0.78807	-3.75269	-1.01107
C	-0.62397	-2.0799	-2.83579
C	-3.87137	2.71415	-0.45706
C	-0.97947	1.49693	-2.46033
B	-0.17769	0.72907	1.12922
N	-0.94515	0.24445	2.42312
H	-5.43104	-2.17923	-0.69365
H	0.01794	-1.77177	-0.83174
H	-3.32867	-3.2471	-1.3839
H	-2.27071	2.06606	0.76789
H	-5.40944	0.10623	0.22275
H	-3.28598	2.6808	-1.37586
H	-3.85725	3.74146	-0.08419
H	-4.90502	2.45412	-0.70187
H	-5.15863	1.72213	1.7344
H	-3.97456	2.89539	2.30523
H	-3.77888	1.17257	2.65859
H	-1.44314	-2.54857	-3.38939
H	0.31297	-2.54696	-3.14911
H	-0.58676	-1.02978	-3.11516
H	-1.08645	-3.96449	0.01637
H	0.22379	-4.13703	-1.15927
H	-1.44933	-4.31873	-1.67291
H	2.61462	2.51981	-0.20661
H	1.40571	-0.91724	2.69578
H	2.94375	-3.3017	0.29023
H	-0.3217	-2.26526	1.38321
H	0.0147	-2.94262	3.0016
H	0.70535	-3.66475	1.55303
H	4.24818	-0.11931	-2.20962
H	3.06711	-3.46383	2.51225
H	2.357	-2.78082	3.97514
H	3.62445	-1.89844	3.10532
H	4.0938	-2.53581	-1.76411
H	4.8288	1.95864	0.71908
H	4.93745	3.29803	-0.43671
H	5.45173	1.67145	-0.90717
H	3.83808	1.88414	-2.9263
H	3.26572	3.45003	-2.36048
H	2.11322	2.13163	-2.62628
H	0.6049	3.29155	-0.99458
H	1.0521	2.82823	2.90241
H	0.181	3.97592	1.86424
H	1.90585	3.67614	1.62137
H	-0.28563	0.94904	-3.10367
H	-1.01664	2.52535	-2.82236
H	-1.96693	1.0465	-2.58451
H	-1.91239	0.5603	2.43516
H	-0.94041	-0.77196	2.51024
H	-0.45506	0.63136	3.22491

## Sheet: Ga-opt
73
-3162.98
Ga	1e-05	-5e-05	-0.97826
N	1.42594	-9e-05	0.53506
C	1.25328	0.00015	1.8469
C	0	0.0004	2.46213
C	-1.25329	0.00043	1.84693
N	-1.42595	0.00016	0.5351
C	2.74655	-0.00011	0.00585
C	3.36913	-1.22112	-0.29264
C	4.62019	-1.19643	-0.89794
C	5.24487	-0.00014	-1.20154
C	4.62048	1.19617	-0.89736
C	3.36944	1.22089	-0.29204
C	2.697	-2.54323	0.00405
C	2.18101	-3.18679	-1.28084
C	2.69754	2.54301	0.00512
C	3.60923	3.50094	0.76447
C	2.45758	0.00028	2.74324
C	-2.45758	0.00072	2.74329
C	-2.74656	6e-05	0.00586
C	-3.36927	-1.22104	-0.292
C	-4.62033	-1.19652	-0.89728
C	-5.24487	-0.00031	-1.20152
C	-4.62032	1.19608	-0.89802
C	-3.36927	1.22097	-0.29272
C	-2.69722	-2.54306	0.00525
C	-3.60866	-3.50078	0.76518
C	-2.69725	2.54318	0.0038
C	-3.60863	3.5011	0.76359
C	3.60821	-3.50109	0.76408
C	2.18067	3.18652	-1.27945
C	-2.18078	-3.18691	-1.27932
C	-2.18116	3.1866	-1.28111
H	-6.21902	-0.00045	-1.67689
H	-1.83225	2.33881	0.63901
H	-5.11288	2.13126	-1.1399
H	-1.83239	-2.33838	0.6406
H	-5.11291	-2.13184	-1.13859
H	-3.99363	-3.04649	1.68117
H	-3.06176	-4.40644	1.03886
H	-4.46622	-3.80675	0.16097
H	-3.0074	-3.4139	-1.95819
H	-1.65453	-4.11998	-1.06043
H	-1.49335	-2.52077	-1.80695
H	-4.46652	3.8065	0.15956
H	-3.06186	4.40705	1.03656
H	-3.99311	3.0472	1.67998
H	-1.49385	2.5203	-1.80869
H	-1.65486	4.11975	-1.06266
H	-3.00794	3.41339	-1.95985
H	1.83292	2.3385	0.6408
H	1.83197	-2.33869	0.63917
H	5.11264	-2.13169	-1.13975
H	1.49379	-2.52052	-1.80857
H	1.65467	-4.1199	-1.06235
H	3.00787	-3.41365	-1.95947
H	5.11317	2.13142	-1.13873
H	4.46615	-3.80668	0.16022
H	3.06132	-4.40694	1.03714
H	3.99262	-3.04708	1.68045
H	6.21901	-0.00014	-1.67694
H	3.99452	3.0469	1.68045
H	3.0624	4.40666	1.03809
H	4.46658	3.80678	0.1599
H	3.00707	3.4133	-1.95866
H	1.6545	4.11965	-1.06065
H	1.49306	2.52024	-1.80668
H	1e-05	0.00058	3.54262
H	-3.08176	0.87511	2.54543
H	-2.16669	0.00138	3.79204
H	-3.08136	-0.8742	2.54645
H	2.16671	-0.00099	3.79199
H	3.08242	-0.87354	2.54498
H	3.08069	0.87576	2.54677

## Sheet: Ga-OA
77
-3219.53
C	5.24774	0.703	-1.03025
C	4.89228	-0.62021	-0.84795
C	3.64596	-0.97134	-0.33977
C	2.74731	0.05299	-0.00746
C	3.08849	1.40138	-0.203
C	4.34627	1.70209	-0.71144
N	1.44795	-0.25294	0.49242
C	1.24737	-0.34577	1.79821
C	2.43254	-0.33026	2.71723
C	3.30191	-2.43474	-0.17939
C	4.28131	-3.15987	0.73998
C	2.134	2.52712	0.12889
C	1.83072	3.37907	-1.09916
C	2.66219	3.3931	1.2697
C	3.24412	-3.12889	-1.5375
C	-0.014	-0.43072	2.38854
C	-1.26851	-0.25795	1.78637
N	-1.45234	-0.14727	0.48475
C	-2.73929	0.15069	-0.05406
C	-3.69557	-0.85832	-0.23376
C	-4.92189	-0.50962	-0.79265
C	-5.19776	0.78926	-1.17029
C	-4.23602	1.77078	-1.00354
C	-2.99623	1.4751	-0.45191
C	-3.45167	-2.30312	0.14068
C	-3.42446	-3.19052	-1.1009
C	-1.96162	2.5618	-0.25552
C	-2.04096	3.66068	-1.30543
C	-2.0405	3.15794	1.14835
C	-4.49456	-2.81385	1.13312
C	-2.44356	-0.19358	2.71809
Ga	-0.00541	-0.46373	-0.83767
N	-0.19777	-2.22038	-1.42829
H	-6.15955	1.03853	-1.60388
H	-0.98011	2.0928	-0.35702
H	-4.454	2.78512	-1.31334
H	-2.46679	-2.36837	0.60823
H	-5.67229	-1.27865	-0.93783
H	-4.58381	-2.16769	2.00862
H	-4.23295	-3.81893	1.47354
H	-5.48257	-2.87278	0.66949
H	-4.37541	-3.13903	-1.63822
H	-3.25777	-4.23325	-0.81564
H	-2.61505	-2.88627	-1.76484
H	-3.01989	3.61331	1.31989
H	-1.27942	3.93258	1.27699
H	-1.87955	2.40284	1.91882
H	-2.01513	3.24791	-2.31586
H	-1.19386	4.34062	-1.19568
H	-2.94878	4.26082	-1.20315
H	1.19532	2.08075	0.46261
H	2.30674	-2.49247	0.26713
H	5.59726	-1.40234	-1.10728
H	2.5404	-2.6275	-2.20236
H	2.92746	-4.16922	-1.42465
H	4.22599	-3.12822	-2.01828
H	4.62347	2.7398	-0.86126
H	5.28573	-3.18065	0.3096
H	3.96566	-4.19532	0.89043
H	4.35514	-2.68327	1.71953
H	6.22482	0.95567	-1.42584
H	2.84718	2.80485	2.17078
H	1.9399	4.17415	1.52084
H	3.60012	3.88165	0.99262
H	2.73493	3.85576	-1.48609
H	1.12321	4.17195	-0.84471
H	1.39614	2.77512	-1.8974
H	-0.02425	-0.52758	3.46467
H	3.07697	-1.18905	2.52063
H	2.11831	-0.35461	3.75843
H	3.04237	0.55881	2.54809
H	-3.24829	0.42029	2.31643
H	-2.13984	0.19164	3.69032
H	-2.84251	-1.20032	2.86605
H	0.07837	-2.97097	-0.81226
H	0.13963	-2.4275	-2.35638
H	0.05591	0.65127	-1.93718

## Sheet: Ga-adduct
77
-3219.51
C	5.24265	0.85893	-1.0063
C	4.92597	-0.4788	-0.85363
C	3.6908	-0.87468	-0.35567
C	2.75125	0.1099	-0.00829
C	3.06078	1.46975	-0.16593
C	4.31146	1.82026	-0.66199
N	1.45504	-0.25382	0.44252
C	1.24476	-0.43643	1.73008
C	2.41155	-0.41506	2.67926
C	3.37525	-2.34637	-0.22503
C	4.48701	-3.13444	0.4588
C	2.07176	2.55789	0.18307
C	1.70738	3.3776	-1.05022
C	2.59226	3.45842	1.29958
C	3.04972	-2.94348	-1.59264
C	-0.02373	-0.61679	2.30256
C	-1.27874	-0.36647	1.72275
N	-1.46903	-0.16196	0.43542
C	-2.75581	0.20994	-0.033
C	-3.75946	-0.75234	-0.2252
C	-5.00248	-0.34203	-0.69414
C	-5.2551	0.98459	-0.98327
C	-4.24594	1.91932	-0.83253
C	-2.98664	1.55586	-0.37109
C	-3.50209	-2.22506	-0.00413
C	-3.26821	-2.91492	-1.34766
C	-1.88564	2.58531	-0.23828
C	-2.06526	3.77286	-1.17276
C	-1.72319	3.06741	1.20159
C	-4.61394	-2.92346	0.77069
C	-2.44636	-0.30435	2.67123
Ga	-0.01061	-0.50761	-1.1137
N	-0.07126	-2.87626	-0.15683
H	-6.23062	1.28927	-1.34445
H	-0.9537	2.08361	-0.52156
H	-4.44149	2.95245	-1.09011
H	-2.58604	-2.31085	0.58352
H	-5.78449	-1.07812	-0.8426
H	-4.83007	-2.41613	1.71353
H	-4.32934	-3.9544	0.99622
H	-5.54252	-2.96235	0.19658
H	-4.16549	-2.85419	-1.96872
H	-3.03402	-3.97635	-1.21113
H	-2.45432	-2.44011	-1.90119
H	-2.6499	3.52423	1.56058
H	-0.93112	3.81867	1.26412
H	-1.45953	2.25224	1.87577
H	-2.21598	3.45156	-2.20535
H	-1.17868	4.40822	-1.14242
H	-2.91507	4.39538	-0.88011
H	1.16195	2.07477	0.54489
H	2.4847	-2.42548	0.40203
H	5.65534	-1.23295	-1.12735
H	2.22656	-2.4093	-2.07387
H	2.78235	-4.00235	-1.5075
H	3.9169	-2.87618	-2.25471
H	4.55789	2.86964	-0.78305
H	5.39393	-3.16495	-0.14949
H	4.17266	-4.16809	0.62506
H	4.751	-2.69965	1.42551
H	6.21176	1.15	-1.39487
H	2.83779	2.88453	2.19578
H	1.83968	4.20302	1.57201
H	3.49394	3.9939	0.99069
H	2.58941	3.86052	-1.47861
H	0.99385	4.16282	-0.79044
H	1.26154	2.74788	-1.82342
H	-0.03126	-0.77903	3.37109
H	3.17436	-1.13558	2.37755
H	2.09482	-0.63408	3.69732
H	2.89172	0.56597	2.66383
H	-3.03615	0.59761	2.49872
H	-2.11029	-0.31956	3.70636
H	-3.1186	-1.15017	2.51147
H	-0.90965	-3.38438	-0.4047
H	0.73023	-3.42553	-0.43703
H	-0.04833	-2.74642	0.84993

[truncated: 32 more sheets: In-opt, In-OA, In-adduct, C-opt, C-1,1-OA, C-1,4-OA, C-adduct, Ge-opt, Ge-OA, Ge-adduct, Pb-opt, Pb-OA, Pb-adduct, Si-opt, Si-1,1OA, Si-1,4OA, Si-adduct, Sn-opt, Sn-OA, Sn-adduct …]
